# Supplementary material
Source: PubMed Central journal article supplement (PMC7055533)

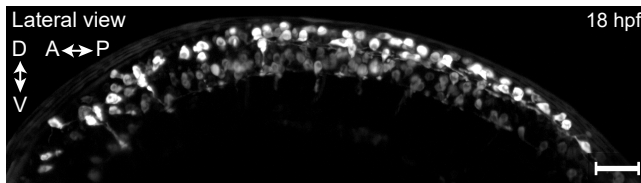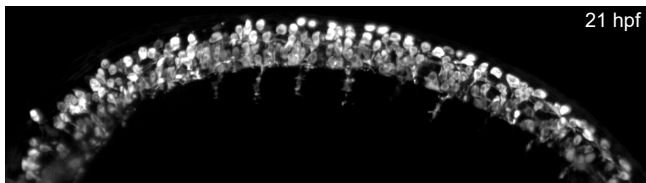

**B**

Activity timing maps for single event

Activity timing maps based on multi-event statistics

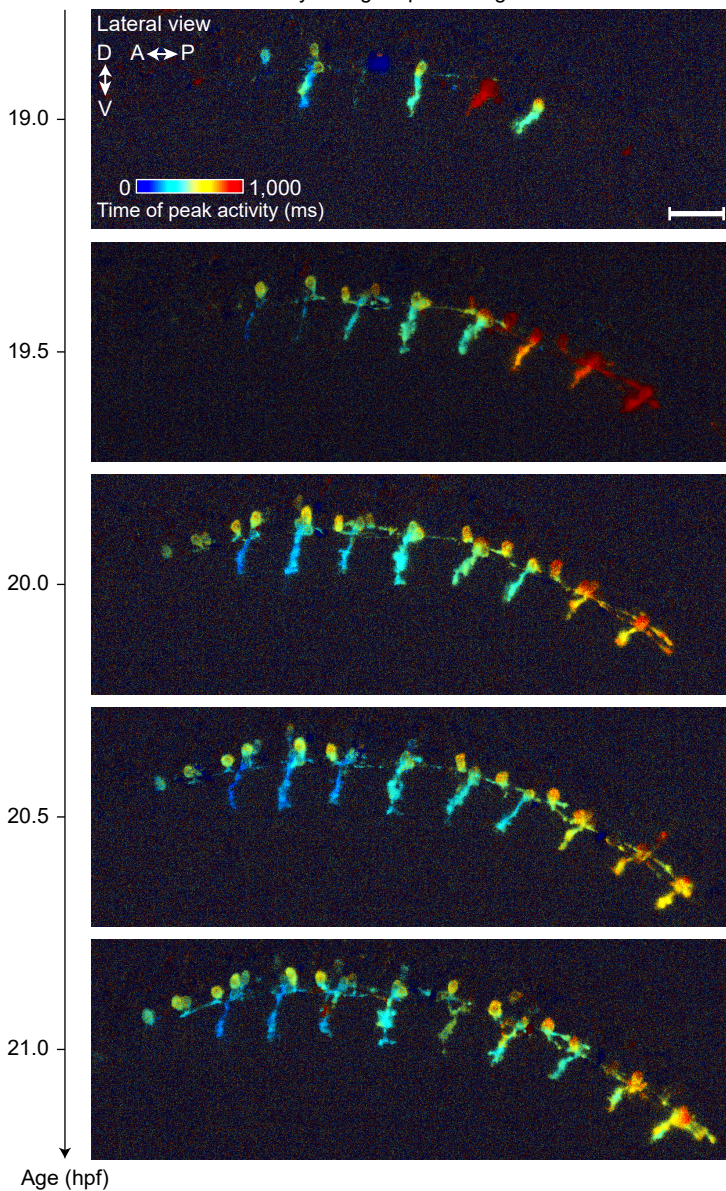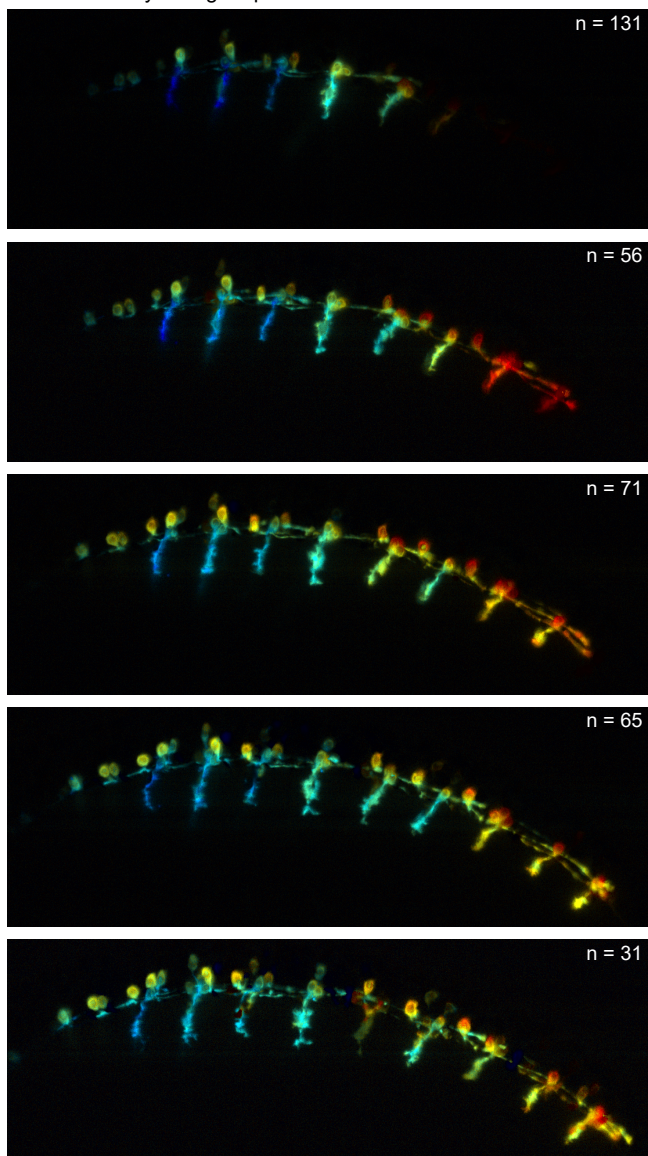

**C**

Raw timing data

**D**

Fitted timing data

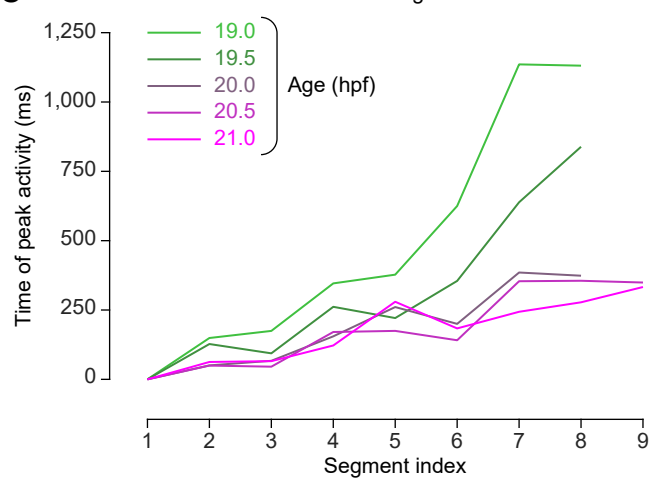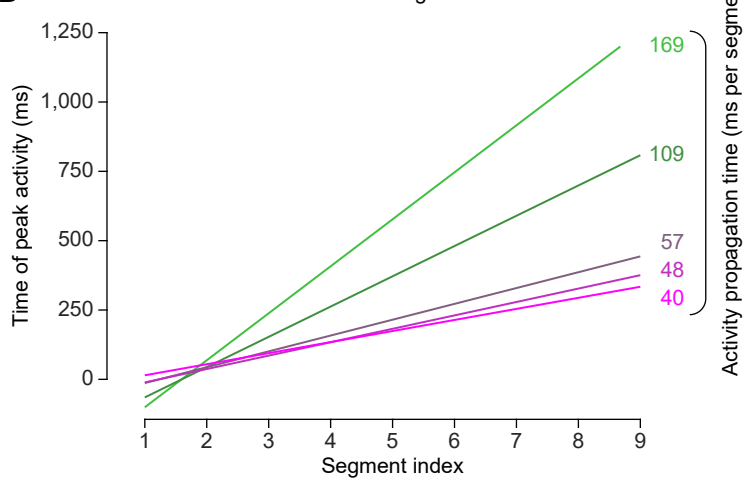

Supplement: NIHMS1545566-supplement-Figure_S5.pdf [file NIHMS1545566-supplement-Figure_S5.pdf]
