# Supplementary material
Source: PubMed Central journal article supplement (PMC7055533)

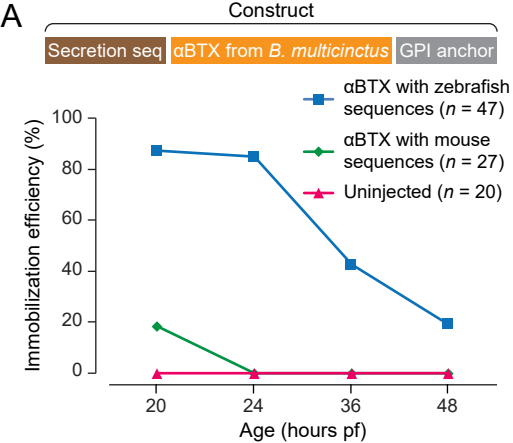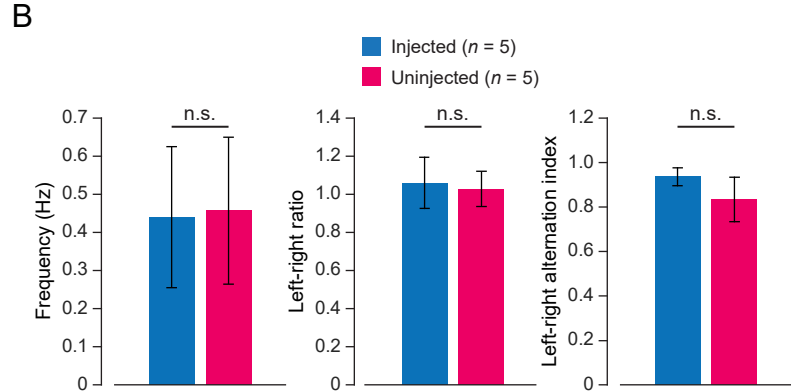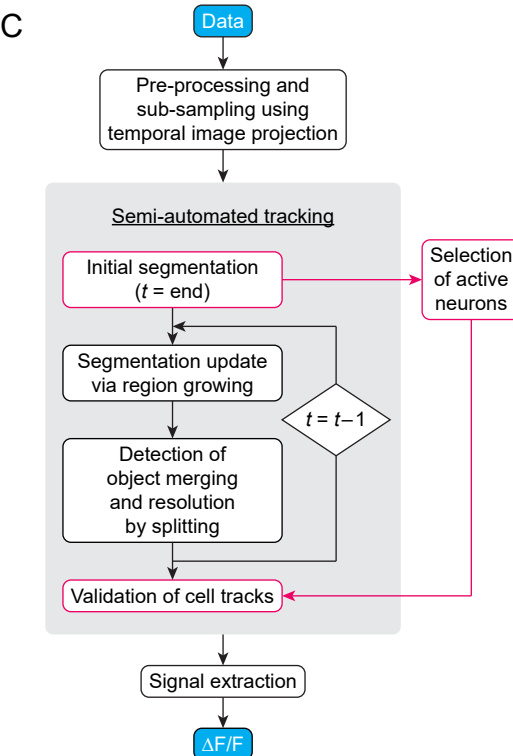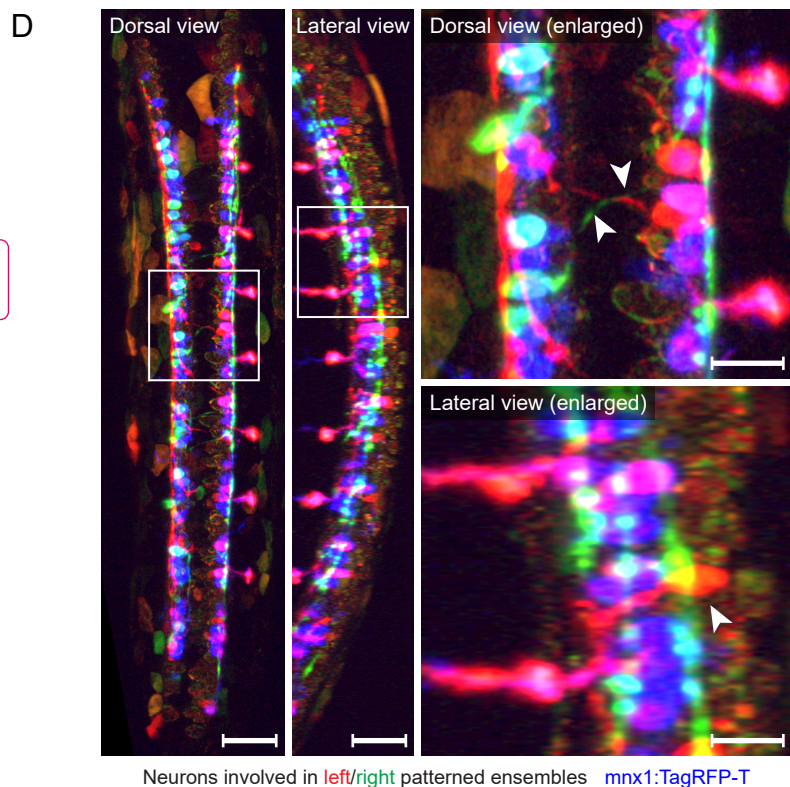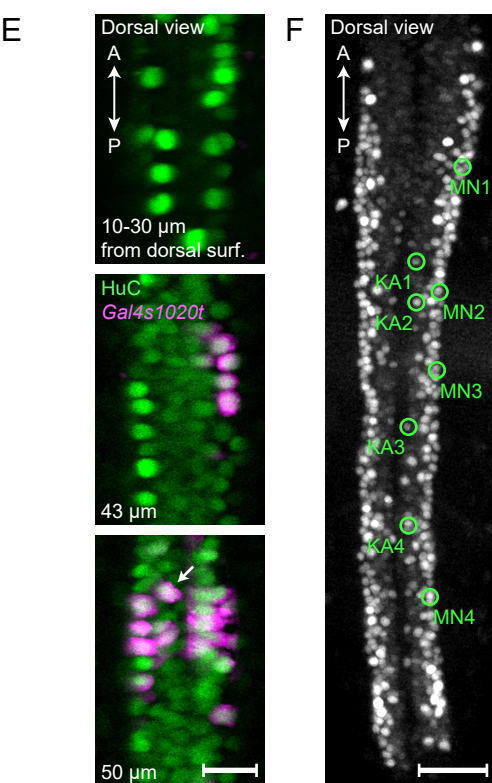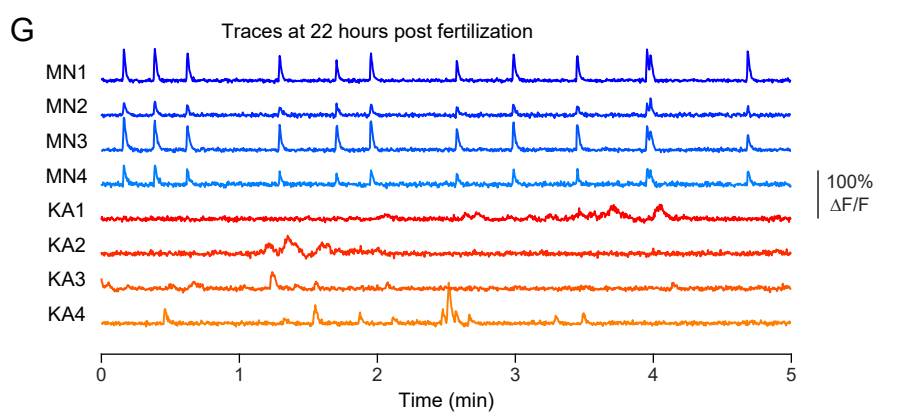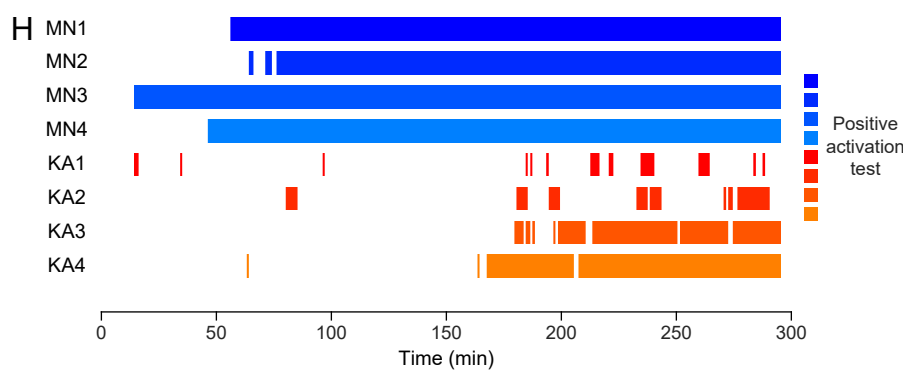

Supplement: NIHMS1545566-supplement-Figure_S1.pdf [file NIHMS1545566-supplement-Figure_S1.pdf]

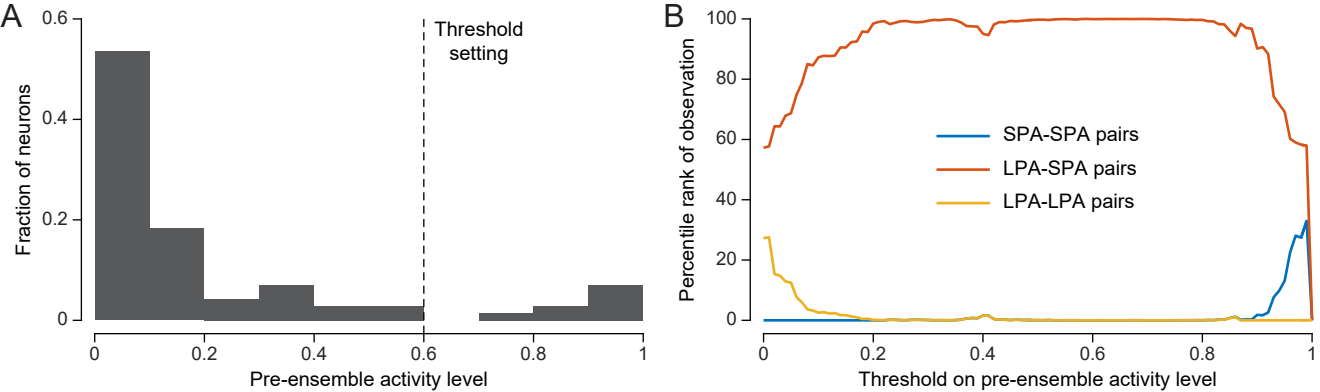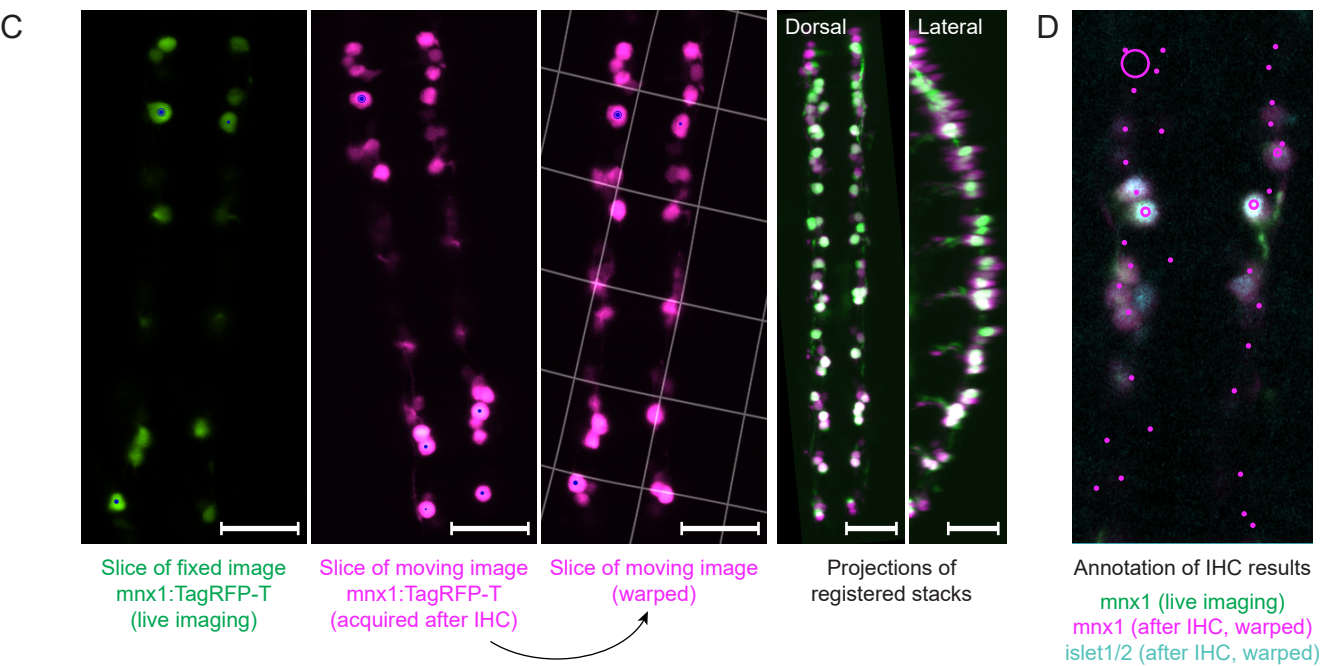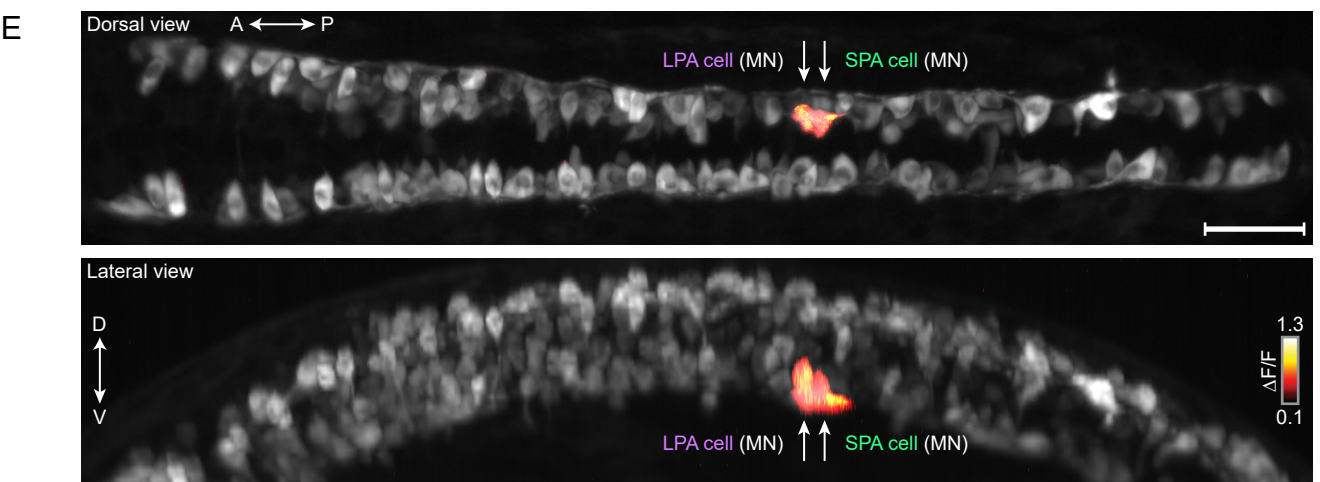

Non-immobilized embryo

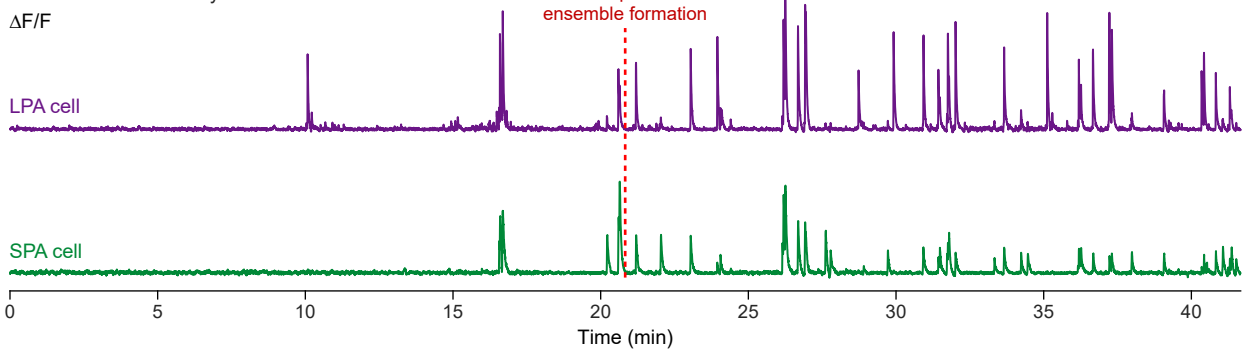

Supplement: NIHMS1545566-supplement-Figure_S3.pdf [file NIHMS1545566-supplement-Figure_S3.pdf]

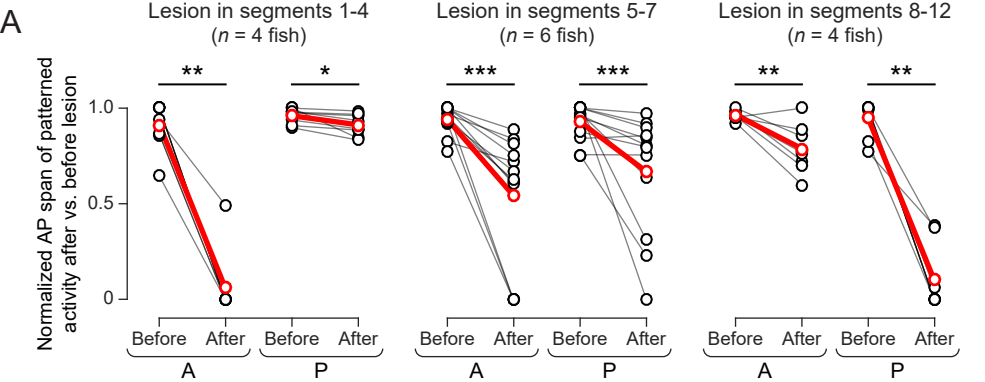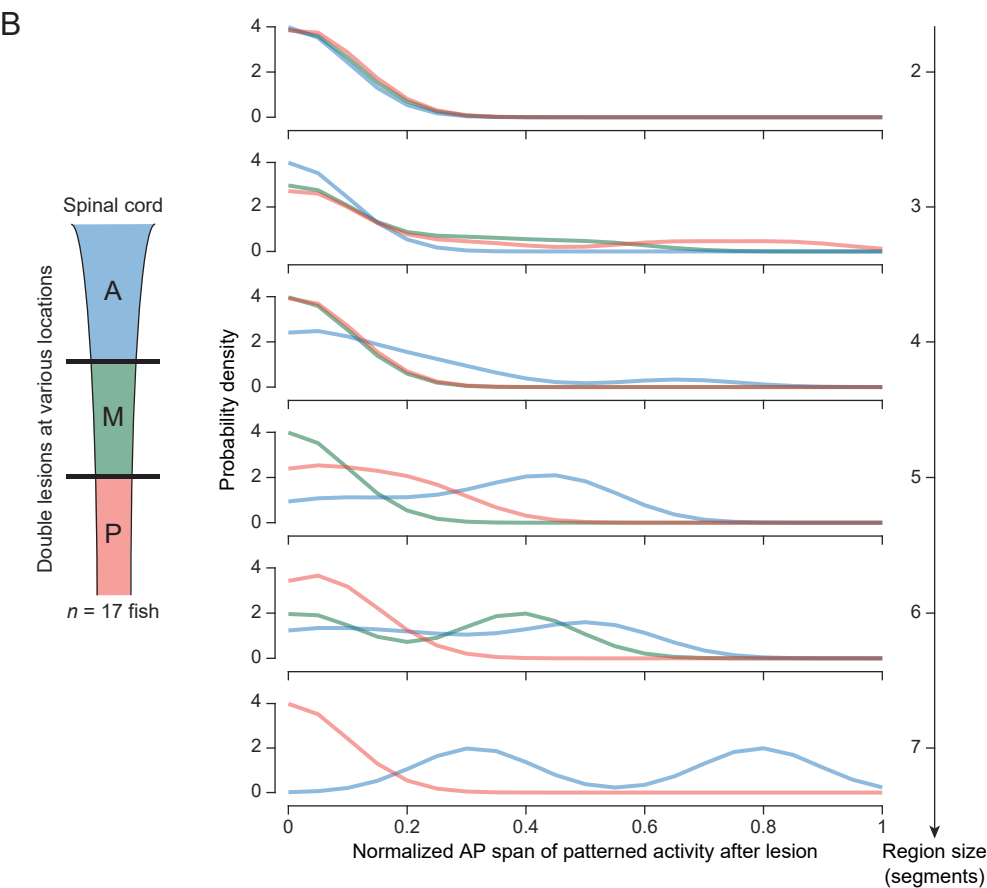

Supplement: NIHMS1545566-supplement-Figure_S4.pdf [file NIHMS1545566-supplement-Figure_S4.pdf]

A

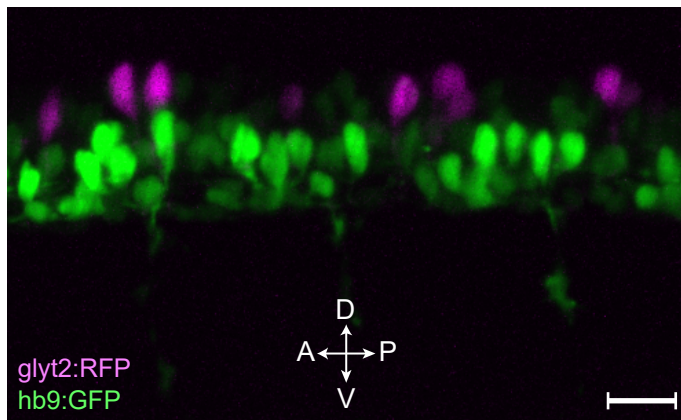

B

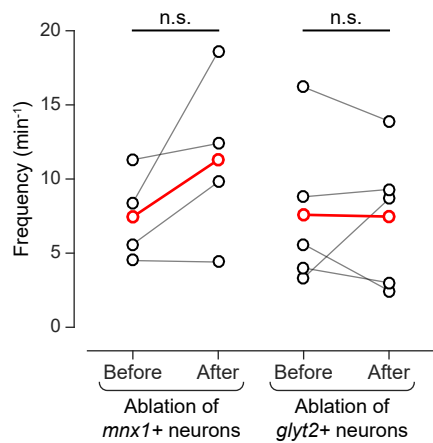

C

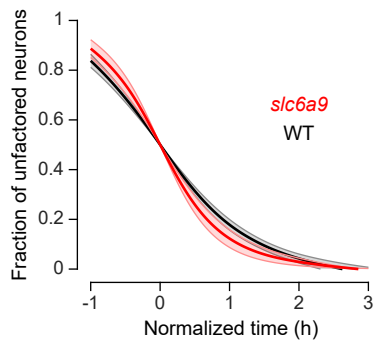

D

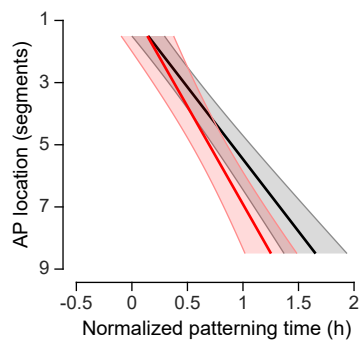

E

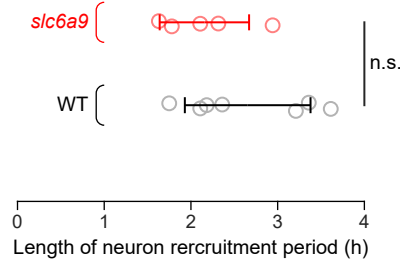

F

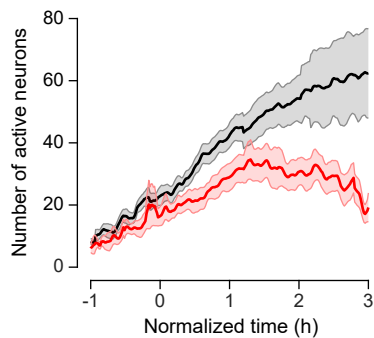

G

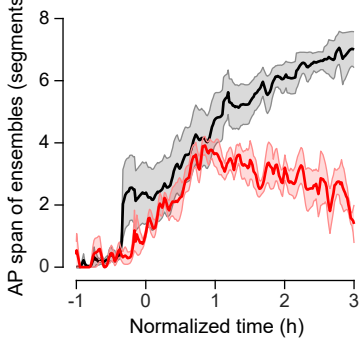

H

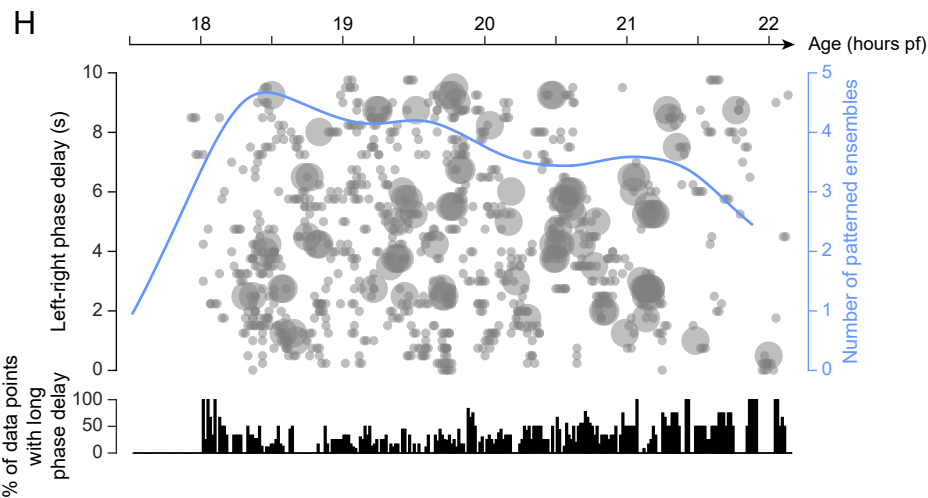

Supplement: NIHMS1545566-supplement-Figure_S6.pdf [file NIHMS1545566-supplement-Figure_S6.pdf]
